# Supplementary material
Source: HighWire-hosted journal article supplement (https://www.annfammed.org/highwire/filestream/7814/field_highwire_adjunct_files/0/Nutting_Suppl_Fig_1.pdf)
Supplement: Nutting_Suppl_Fig_1.pdf [file Nutting_Suppl_Fig_1.pdf]

## Online Supplementary Material

Nutting PA, Dickinson LM, Rubenstein LV, Keeley RD, Smith JL, Elliott CE. Improving detection of suicidal ideation among depressed patients in primary care. *Ann Fam Med*. 2005;3:529-536.

<http://www.annfammed.org/cgi/content/full/3/6/529/DC1>

**Supplemental Figure 1. QuEST CONSORT sample flow.**

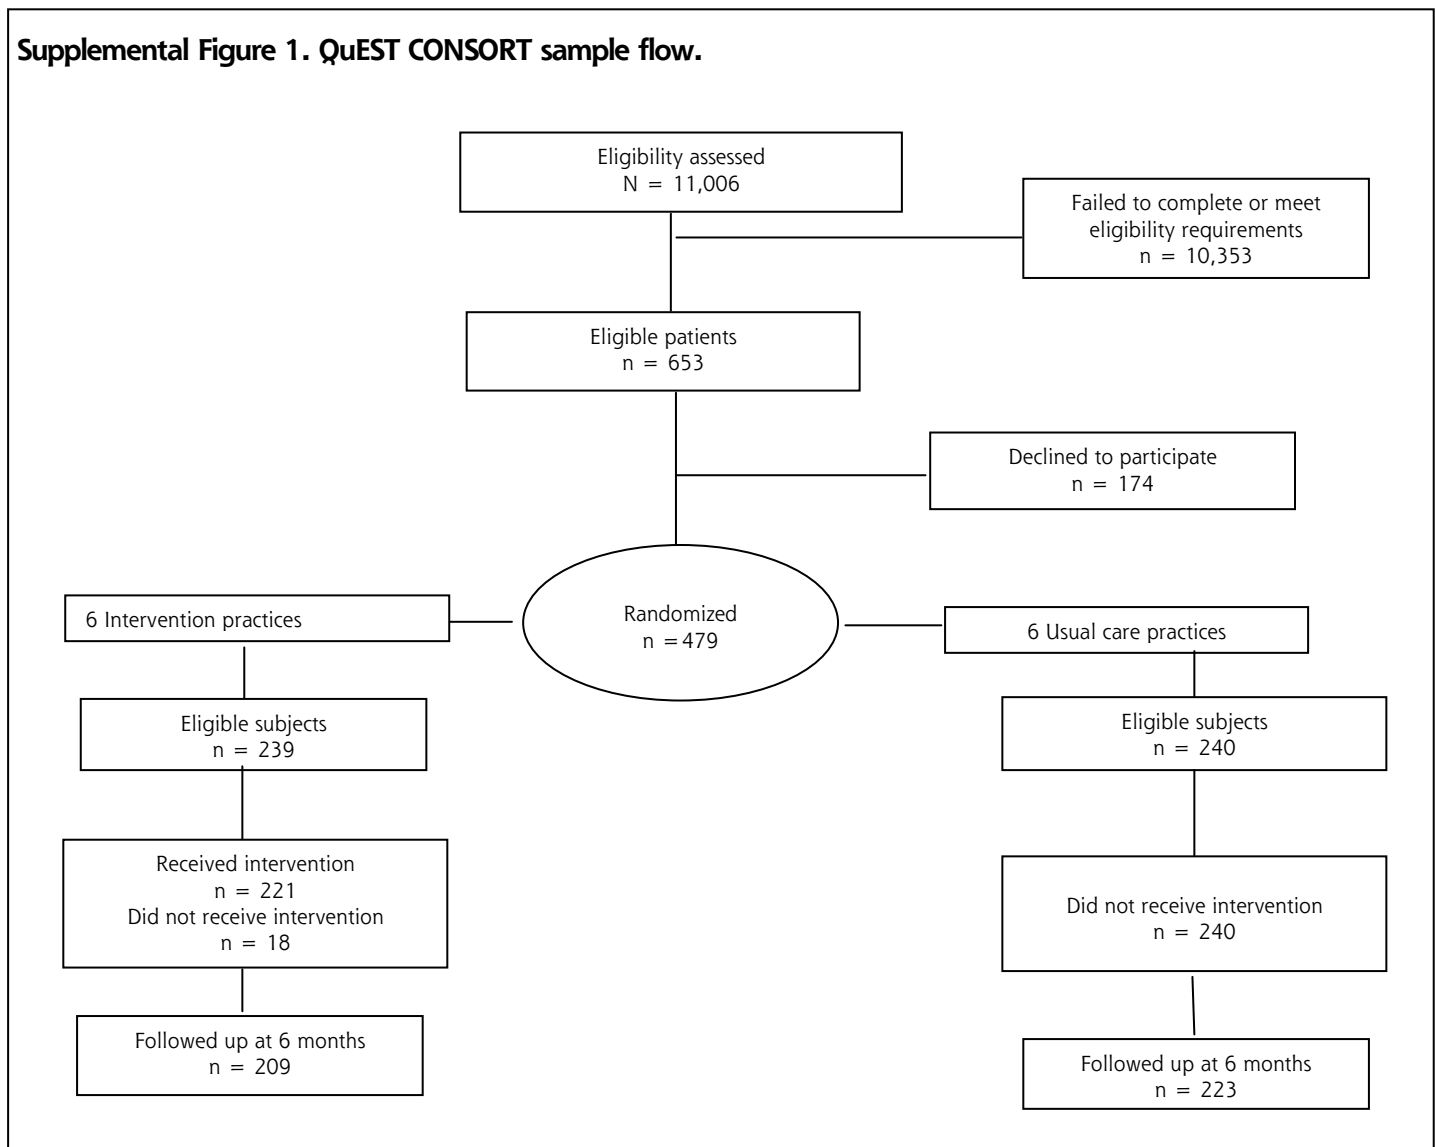

QuEST = Quality Enhancement by Strategic Teaming; CONSORT = Consolidated Standards of Reporting Trials.

Note: The 414 patients the QuEST study contributed to this analysis are a subset of the 432 patients (209 in the intervention practices and 223 in the usual care practices) who were followed up at 6 months and who had all the data elements required for this analysis.
